# Supplementary material
Source: PubMed Central journal article supplement (PMC8463194)
Supplement: EMS124726-supplement-Supplemental_Figure_1.pdf [file EMS124726-supplement-Supplemental_Figure_1.pdf]

A

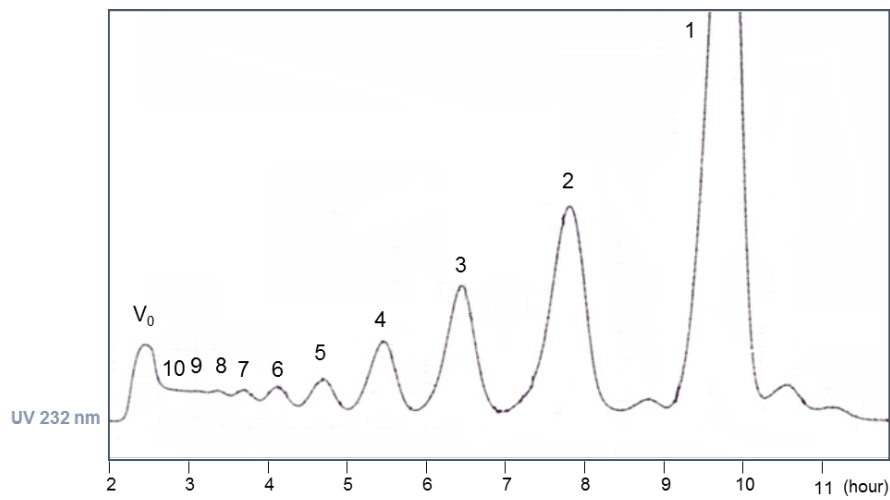

|    | Detected major ions | Deduced compositions      | Assignment |
|----|---------------------|---------------------------|------------|
| F1 | m/z 458.0605 (z=1)  | DUA1.GalNAc1.S1           | DP2        |
|    | m/z 561.0070 (z=1)  | DUA1.GalNAc1.S2.Na        |            |
| F2 | m/z 458.0605 (z=2)  | DUA1.GlcA1.GalNAc2.S2     | DP4        |
|    | m/z 837.1719 (z=1)  | DUA1.GlcA1.GalNAc2.S1     |            |
| F3 | m/z 709.5765 (z=2)  | DUA1.GlcA2.GalNAc3.S3.Na2 | DP6        |

B

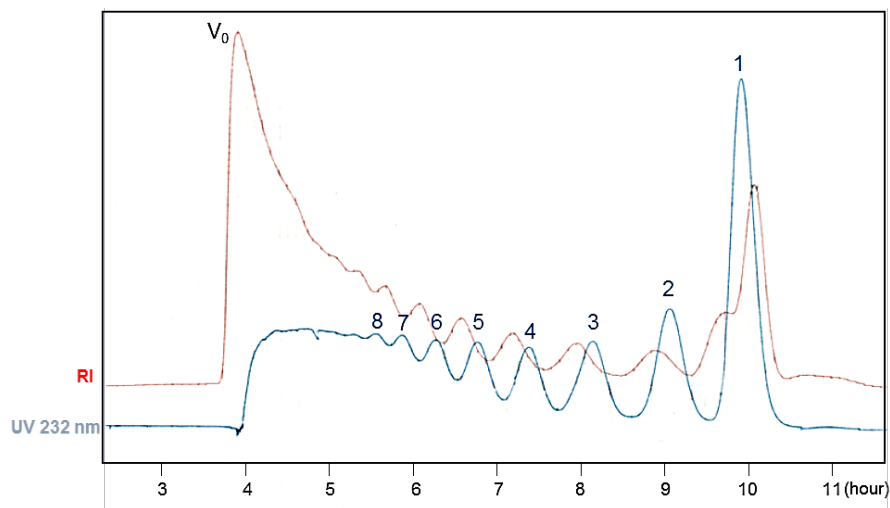

|    | Detected major ions | Deduced compositions | Assignment |
|----|---------------------|----------------------|------------|
| F1 | m/z 286.9740 (z=3)  | DUA1.HexN1.S3        | DP2        |
| F2 | m/z 213.7894 (z=5)  | DUA1.HexA1.HexN2.S5  | DP4        |
|    | m/z 229.7807 (z=5)  | DUA1.HexA1.HexN2.S6  |            |

**Supplemental Figure 1.** Fractionation and assignment of GAG oligosaccharide fractions of CSC (A) and heparin (B). In each panel the Bio-Gel P6 chromatograph of the oligosaccharide fractions derived from partial enzyme digestion is shown followed by the table showing assignment of selected oligosaccharide fractions by negative-ion ESI-MS. DUA, 4,5-unsaturated uronic acid; GlcA, glucuronic acid; GalNAc, N-Acetylgalactosamine; HexA, hexuronic acid; HexN, Hexamine; S: sulfate. The numbers in the deduced compositions refer to monosaccharides, sulfates and sodium (Na) per molecules of oligosaccharide. DP, degree-of-polymerisation.
